# Supplementary material
Source: PubMed Central journal article supplement (PMC3152974)
Supplement: ct2002946_si_001.pdf [file ct2002946_si_001.pdf]

**Table S1.** Errors (RMSE relative to average interaction energy in the group, in %) for the separate interaction categories in S66 set. Dispersion interactions are divided further into  $\pi$ - $\pi$ , aliphatic-aliphatic and  $\pi$ -aliphatic complexes.

| Method          | S66 categories |            |       | Dispersion subcategories |      |          | Table                               |
|-----------------|----------------|------------|-------|--------------------------|------|----------|-------------------------------------|
|                 | H-bonds        | Dispersion | Other | $\pi$ - $\pi$            | A-A  | $\pi$ -A |                                     |
| MP2/TZ          | 12.7           | 13.7       | 12.1  | 12.5                     | 15.0 | 14.3     | S2. Errors in the S66 set. Relative |
| MP2/aDZ         | 11.6           | 15.1       | 15.4  | 15.8                     | 11.5 | 11.6     |                                     |
| MP2/CBS         | 3.2            | 9.2        | 17.5  | 8.9                      | 9.4  | 7.8      |                                     |
| MP2C/CBS        | 11.3           | 12.4       | 14.3  | 10.6                     | 6.3  | 19.7     |                                     |
| SCS-MP2/CBS     | 12.5           | 19.0       | 15.4  | 13.1                     | 21.2 | 30.9     |                                     |
| SCS-MI-MP2/CBS  | 4.5            | 10.2       | 5.5   | 2.9                      | 11.6 | 21.4     |                                     |
| DW-MP2/CBS      | 3.7            | 10.8       | 6.2   | 2.4                      | 12.1 | 23.2     |                                     |
| MP3/CBS         | 3.6            | 9.0        | 15.2  | 5.0                      | 11.9 | 15.1     |                                     |
| MP2.5/CBS       | 1.0            | 3.3        | 3.4   | 2.2                      | 3.7  | 5.4      |                                     |
| CCSD/CBS        | 7.2            | 13.0       | 15.2  | 8.8                      | 15.2 | 20.7     |                                     |
| SCS-CCSD/CBS    | 2.7            | 4.9        | 5.3   | 5.4                      | 2.4  | 3.2      |                                     |
| SCS-MI-CCSD/CBS | 1.1            | 2.1        | 1.1   | 0.9                      | 1.7  | 4.4      |                                     |

*e* errors for geometries with intermolecular distance shorter and longer than equilibrium are listed separately (the equilibrium geometry and the 5% displacements from it are excluded).

| Method          | S66x8         | S66x8 short | S66x8 long |
|-----------------|---------------|-------------|------------|
|                 | RMSE kcal/mol | RMSE %      | RMSE %     |
| MP2/TZ          | 0.59          | 21          | 13         |
| MP2/aDZ         | 0.67          | 28          | 11         |
| MP2/CBS         | 0.67          | 23          | 9          |
| SCS-MP2/CBS     | 0.71          | 31          | 15         |
| SCS-MI-MP2/CBS  | 0.32          | 13          | 5          |
| DW-MP2/CBS      | 0.36          | 16          | 6          |
| MP3/CBS         | 0.56          | 26          | 9          |
| MP2.5/CBS       | 0.14          | 5           | 3          |
| CCSD/CBS        | 0.61          | 29          | 10         |
| SCS-CCSD/CBS    | 0.21          | 7           | 4          |
| SCS-MI-CCSD/CBS | 0.07          | 3           | 1          |

**Figure S1.** Structures of the complexes in the S66 dataset. Type of the complex is indicated by color: hydrogen bond (blue), dispersion (red), other (green).

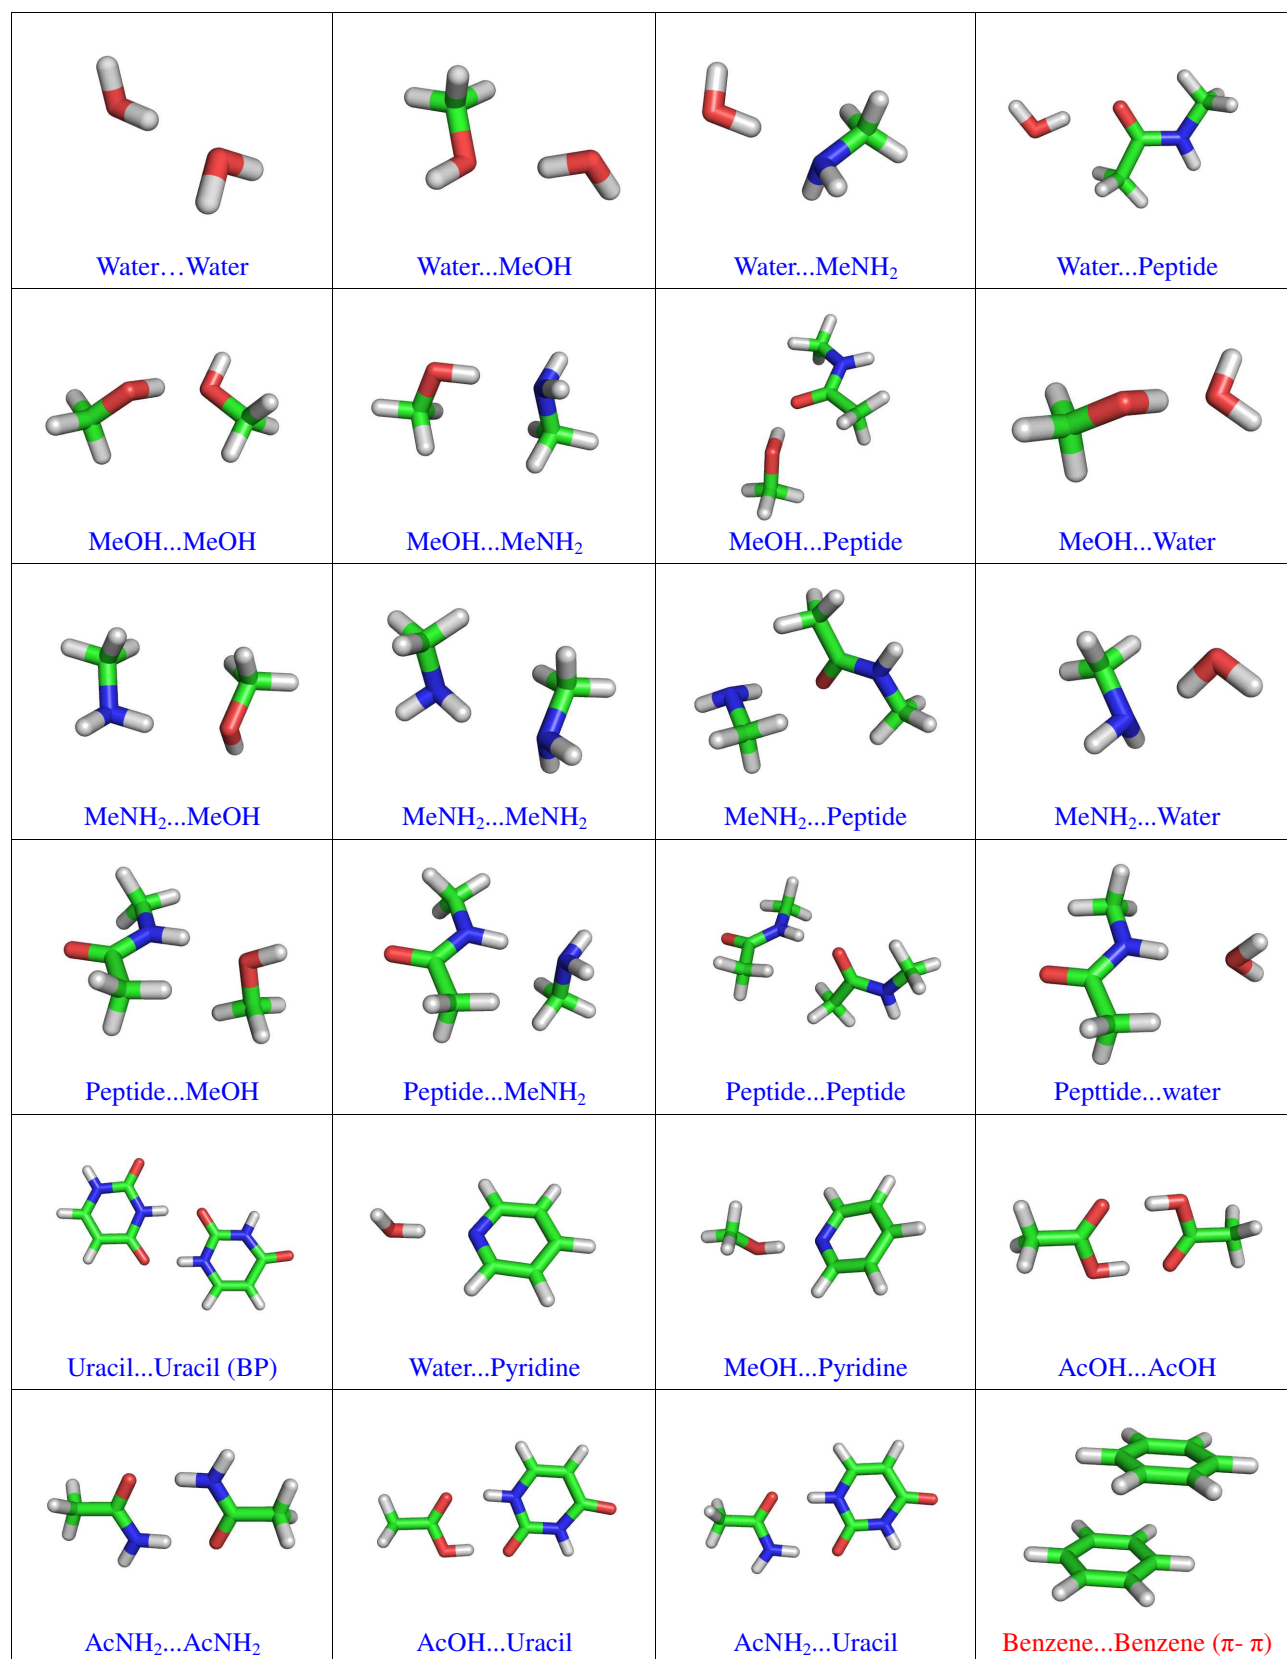

|                                                                                     |                                                                                     |                                                                                      |                                                                                       |
|-------------------------------------------------------------------------------------|-------------------------------------------------------------------------------------|--------------------------------------------------------------------------------------|---------------------------------------------------------------------------------------|
| 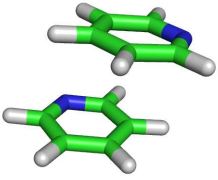   |    |    |    |
| Pyridine...Pyridine ( $\pi$ - $\pi$ )                                               | Uracil...Uracil ( $\pi$ - $\pi$ )                                                   | Benzene...Pyridine ( $\pi$ - $\pi$ )                                                 | Benzene...Uracil ( $\pi$ - $\pi$ )                                                    |
|    | Ben<br>zene<br>...Et<br>hene                                                        |    |    |
| Pyridine...Uracil ( $\pi$ - $\pi$ )                                                 |                                                                                     | Uracil...Ethene                                                                      | Uracil...Ethyne                                                                       |
|    |    |    |    |
| Pyridine...Ethene                                                                   | Pentane...Pentane                                                                   | Neopentane...Neopentane                                                              | Cyclopentane...Cyclopentane                                                           |
|  |  |   |   |
| Pentane...Neopentane                                                                | Neopentane...Cyclopentane                                                           | Benzene...Cyclopentane                                                               | Benzene...Neopentane                                                                  |
|  |  |  |  |
| Uracil...Pentane                                                                    | Uracil...Cyclopentane                                                               | Uracil...Neopentane                                                                  | Ethene...Pentane                                                                      |
|  |  |  |  |
| Ethyne...Pentane                                                                    | Peptide...Pentane                                                                   | MeNH <sub>2</sub> ...Pyridine                                                        | Benzene...Benzene (TS)                                                                |

|                                                                                                                                           |                                                                                                                                           |                                                                                                                                 |                                                                                                                                 |
|-------------------------------------------------------------------------------------------------------------------------------------------|-------------------------------------------------------------------------------------------------------------------------------------------|---------------------------------------------------------------------------------------------------------------------------------|---------------------------------------------------------------------------------------------------------------------------------|
| 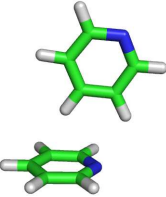 <p>Pyridine...Pyridine (TS)</p>                         |  <p>Benzene...Pyridine (TS)</p>                          |  <p>Benzene...Ethyne (TS)</p>                 |  <p>Ethyne...Ethyne (TS)</p>                 |
|  <p>Benzene...AcOH (OH-<math>\pi</math>)</p>             |  <p>Benzene...AcNH<sub>2</sub> (NH-<math>\pi</math>)</p> |  <p>Benzene...Water (OH-<math>\pi</math>)</p> |  <p>Benzene...MeOH (OH-<math>\pi</math>)</p> |
|  <p>Benzene...MeNH<sub>2</sub> (NH-<math>\pi</math>)</p> |  <p>Benzene...Peptide (NH-<math>\pi</math>)</p>          |  <p>Pyridine...Pyridine (CH-N)</p>            |  <p>Ethyne...Water (CH-O)</p>                |
|  <p>Ethyne...AcOH (OH-<math>\pi</math>)</p>            |  <p>Pentane...AcOH</p>                                 |  <p>Pentane...AcNH<sub>2</sub></p>          |  <p>Benzene...AcOH</p>                     |
|  <p>Peptide...Ethene</p>                               |  <p>Pyridine...Ethyne (CH-N)</p>                       |                                                                                                                                 |                                                                                                                                 |

**Table S3.** Definitions of the coordinate used to displace the complexes forming the S66x8 dataset. Information is provided only for the complexes where the coordinate is not the vector connecting centers of mass of the molecules. Here, the vector is defined by one or more atoms in each molecule. If more atoms are used, their center of mass is used in all cases with the exception of averaging of multiple H-bonds (as indicated in the table) where unit weighting is applied.

| System# | Atoms in monomer A | Atoms in monomer B | Remark             |
|---------|--------------------|--------------------|--------------------|
| 1       | 3                  | 4                  |                    |
| 2       | 3                  | 4                  |                    |
| 3       | 3                  | 4                  |                    |
| 4       | 3                  | 9                  |                    |
| 5       | 2                  | 7                  |                    |
| 6       | 2                  | 7                  |                    |
| 7       | 2                  | 12                 |                    |
| 8       | 2                  | 7                  |                    |
| 9       | 2                  | 8                  |                    |
| 10      | 2                  | 8                  |                    |
| 11      | 2                  | 13                 |                    |
| 12      | 1                  | 9                  |                    |
| 13      | 8                  | 13                 |                    |
| 14      | 8                  | 13                 |                    |
| 15      | 8                  | 18                 |                    |
| 16      | 8                  | 13                 |                    |
| 17      | 2,4                | 22,24              | average of H-bonds |
| 18      | 3                  | 4                  |                    |
| 19      | 2                  | 7                  |                    |
| 20      | 2,4                | 10,12              | average of H-bonds |
| 21      | 2,4                | 11,13              | average of H-bonds |
| 22      | 2,4                | 18,20              | average of H-bonds |
| 23      | 2,4                | 19,21              | average of H-bonds |
| 40      | 1-12               | 25                 | T-shape            |
| 47      | 1-12               | 14                 | T-shape            |
| 48      | 1-11               | 18                 | T-shape            |
| 49      | 1-12               | 19                 | T-shape            |
| 50      | 1-12               | 14                 | T-shape            |
| 51      | 1,3                | 6                  |                    |
| 52      | 11                 | 13                 | T-shape            |
| 53      | 1,11               | 16                 | T-shape            |
| 57      | 1-12               | 20                 | T-shape            |
| 58      | 1,3                | 12,22              | average of H-bonds |
| 59      | 2                  | 5                  |                    |
| 60      | 1,3                | 8                  |                    |
| 63      | 1-12               | 17                 |                    |
| 65      | 1                  | 15                 |                    |
| 66      | 2                  | 8                  |                    |

**Table S4.** Comparison of interaction energies (in kcal/) in ten small model complexes. The CCSD(T)/CBS scheme used for the S66 dataset is compared to a benchmark value obtained by extrapolation of the CCSD(T) calculations in aug-cc-pVTZ and aug-cc-pVQZ basis sets.

|                            | $\Delta E_{\text{Benchmark}}$ | $\Delta E_{\text{S66}}$ | <b>Error</b> | <b>Error, %</b> |
|----------------------------|-------------------------------|-------------------------|--------------|-----------------|
| Ammonia ... N <sub>2</sub> | -0.683                        | -0.680                  | 0.003        | 0.41            |
| Ammonia dimer              | -3.147                        | -3.098                  | 0.049        | 1.57            |
| Acetylene dimer            | -1.532                        | -1.524                  | 0.008        | 0.55            |
| Formic acid ... water      | -10.828                       | -10.621                 | 0.207        | 1.91            |
| Methane ... N <sub>2</sub> | -0.349                        | -0.350                  | -0.001       | -0.29           |
| Methane ... water          | -0.973                        | -0.949                  | 0.024        | 2.46            |
| Methane dimer              | -0.528                        | -0.527                  | 0.001        | 0.17            |
| Water ... ammonia          | -6.440                        | -6.347                  | 0.094        | 1.45            |
| Water ... N <sub>2</sub>   | -1.186                        | -1.174                  | 0.012        | 0.99            |
| Water dimer                | -5.012                        | -4.918                  | 0.094        | 1.87            |
| <b>Average abs. err</b>    |                               |                         | 0.049        | 1.17            |
| <b>Max. abs. error</b>     |                               |                         | 0.207        | 2.46            |
| <b>RMSE</b>                |                               |                         | 0.080        | 1.39            |
